# Supplementary material for: A Novel Dual-Function Redox Modulator Relieves Oxidative Stress and Anti-Angiogenic Response in Placental Villus Explant Exposed to Hypoxia—Relevance for Preeclampsia Therapy
Source: MDPI journal article supplement (doi:10.3390/biology12091229), 2023-09-12
Supplement: s1 [file s1]

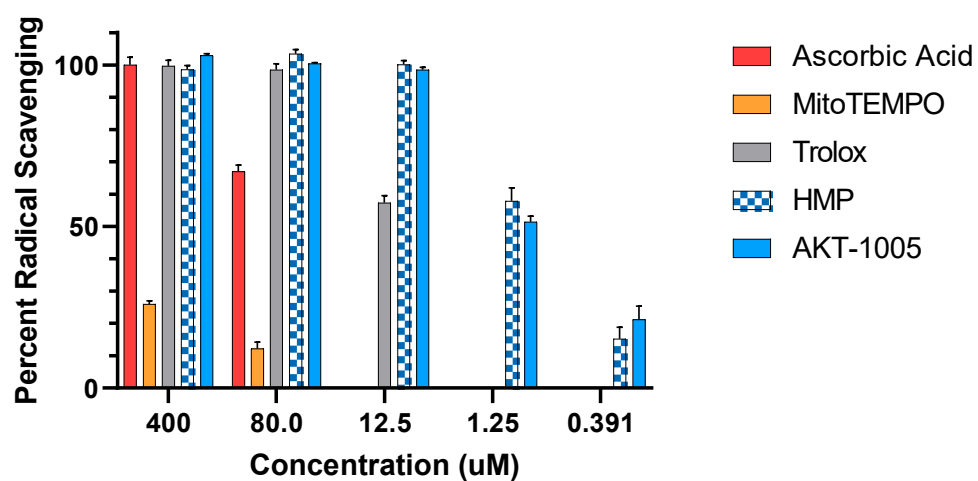

Supplemental Figure S1: Radical scavenging activity of AKT-1005 and HMP compared to the antioxidants Ascorbic Acid, MitoTEMPO, and Trolox at different concentrations in the Oxygen Radical Absorbance Capacity (ORAC) assay. (n = 3 per group).
